# Supplementary material
Source: Springer Nature journal article supplement (https://www.springermedizin.de/resource/supplementary/13023_2013_730_MOESM1_ESM.pdf/9642940)
Supplement: MOESM1 [file 9642940]

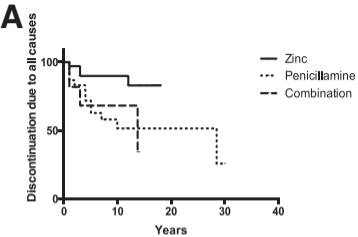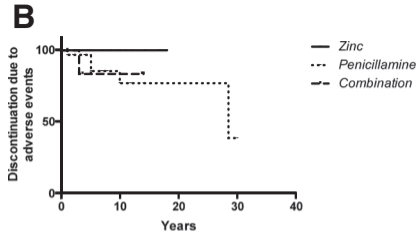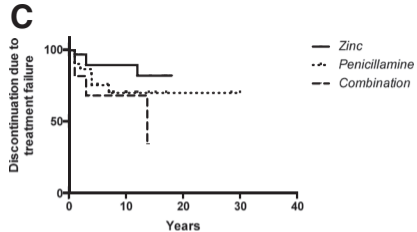

| Reasons for discontinuation   | No. of discontinued treatments    |                          |                                 |                          | P values (Log-rank Mantel Cox) |                              |                     |
|-------------------------------|-----------------------------------|--------------------------|---------------------------------|--------------------------|--------------------------------|------------------------------|---------------------|
|                               | Penicillamine<br>(n= 29 analyzed) | Zinc<br>(n= 34 analyzed) | Combination<br>(n= 11 analyzed) | Total<br>(n=74 analyzed) | Penicillamine vs zinc          | Penicillamine vs combination | Zinc vs combination |
| Treatment failure             | 8                                 | 4                        | 4                               | 16                       | 0.15                           | 0.29                         | 0.03*               |
| Adverse events                | 5                                 | 0                        | 1                               | 6                        | 0.03*                          | 0.85                         | 0.04*               |
| <b>Total Discontinuations</b> | <b>13</b>                         | <b>4</b>                 | <b>4‡</b>                       | <b>21‡</b>               | <b>0.001*</b>                  | <b>0.68</b>                  | <b>0.02*</b>        |
